# Supplementary material for: miR-7/SP1/TP53BP1 axis may play a pivotal role in NSCLC radiosensitivity
Source: PubMed Central journal article supplement — Oncol Rep. 2020 Oct 23;44(6):2678–90. doi: 10.3892/or.2020.7824 (PMC7640372; doi:10.3892/or.2020.7824), 2020-10-23

Figure S1. miR-7 combined with irradiation decreases clone formation. Clone formation assays demonstrated that miR-7 combined with irradiation markedly inhibited the clone formation of A549 cells. miR-7, microRNA-7.

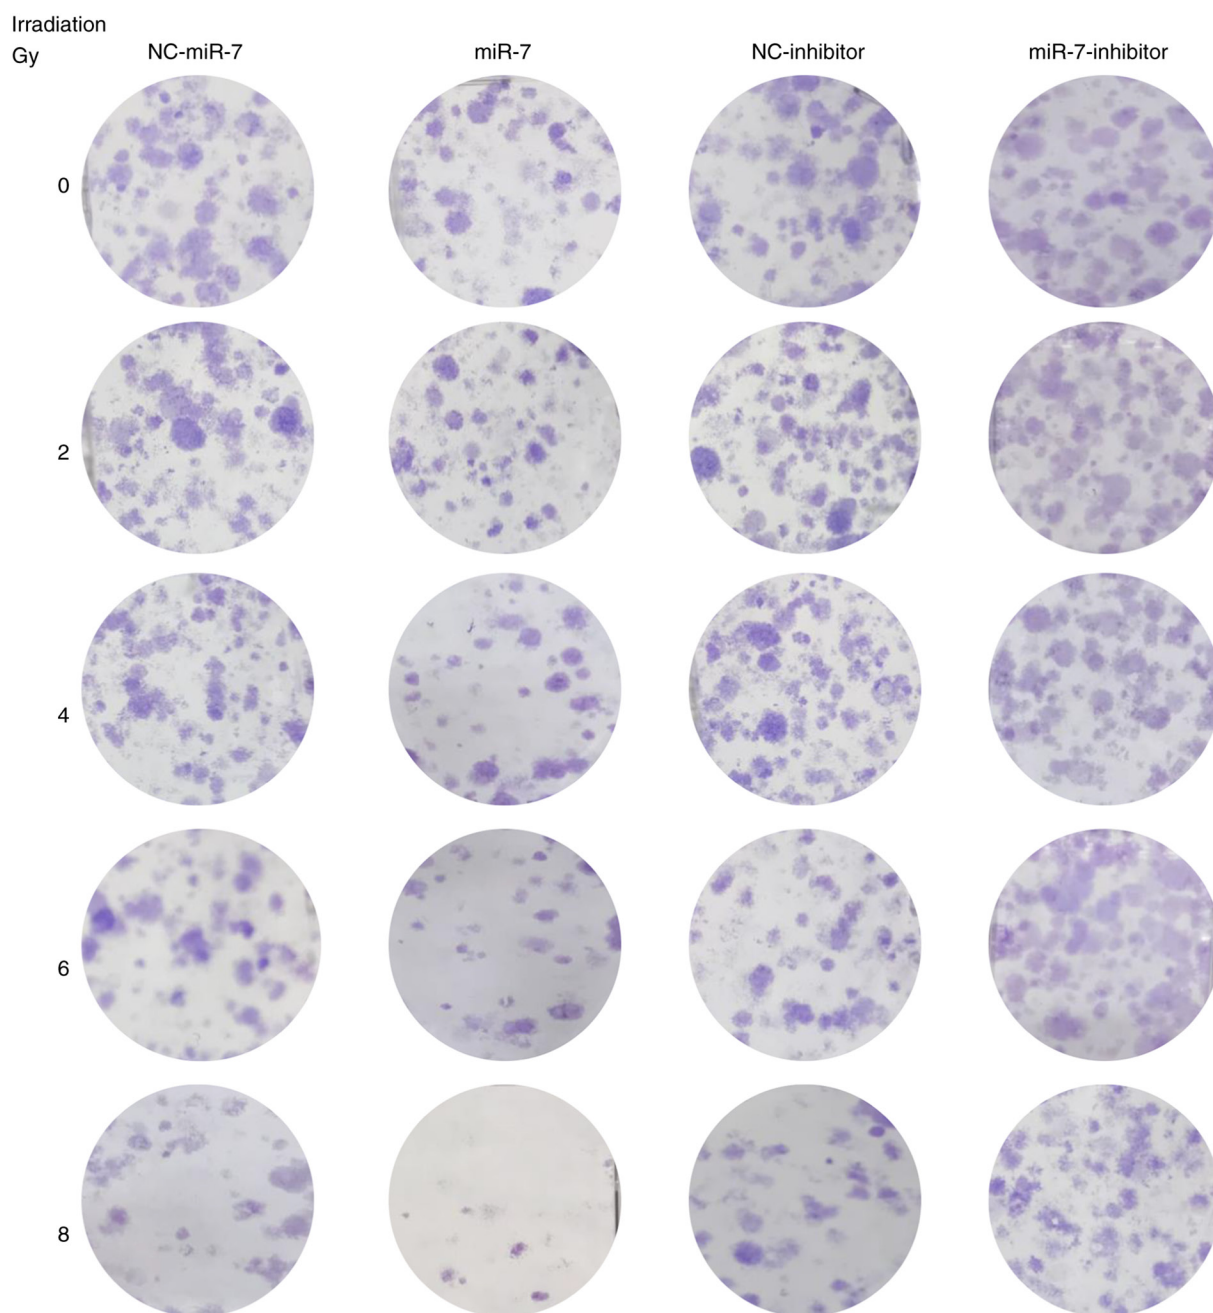

Figure S2. sh-SP1 combined with irradiation decreases clone formation. Clone formation assays demonstrated that sh-SP1 combined with irradiation markedly inhibited the clone formation of A549 cells. SP1, specific protein 1; sh, shRNA.

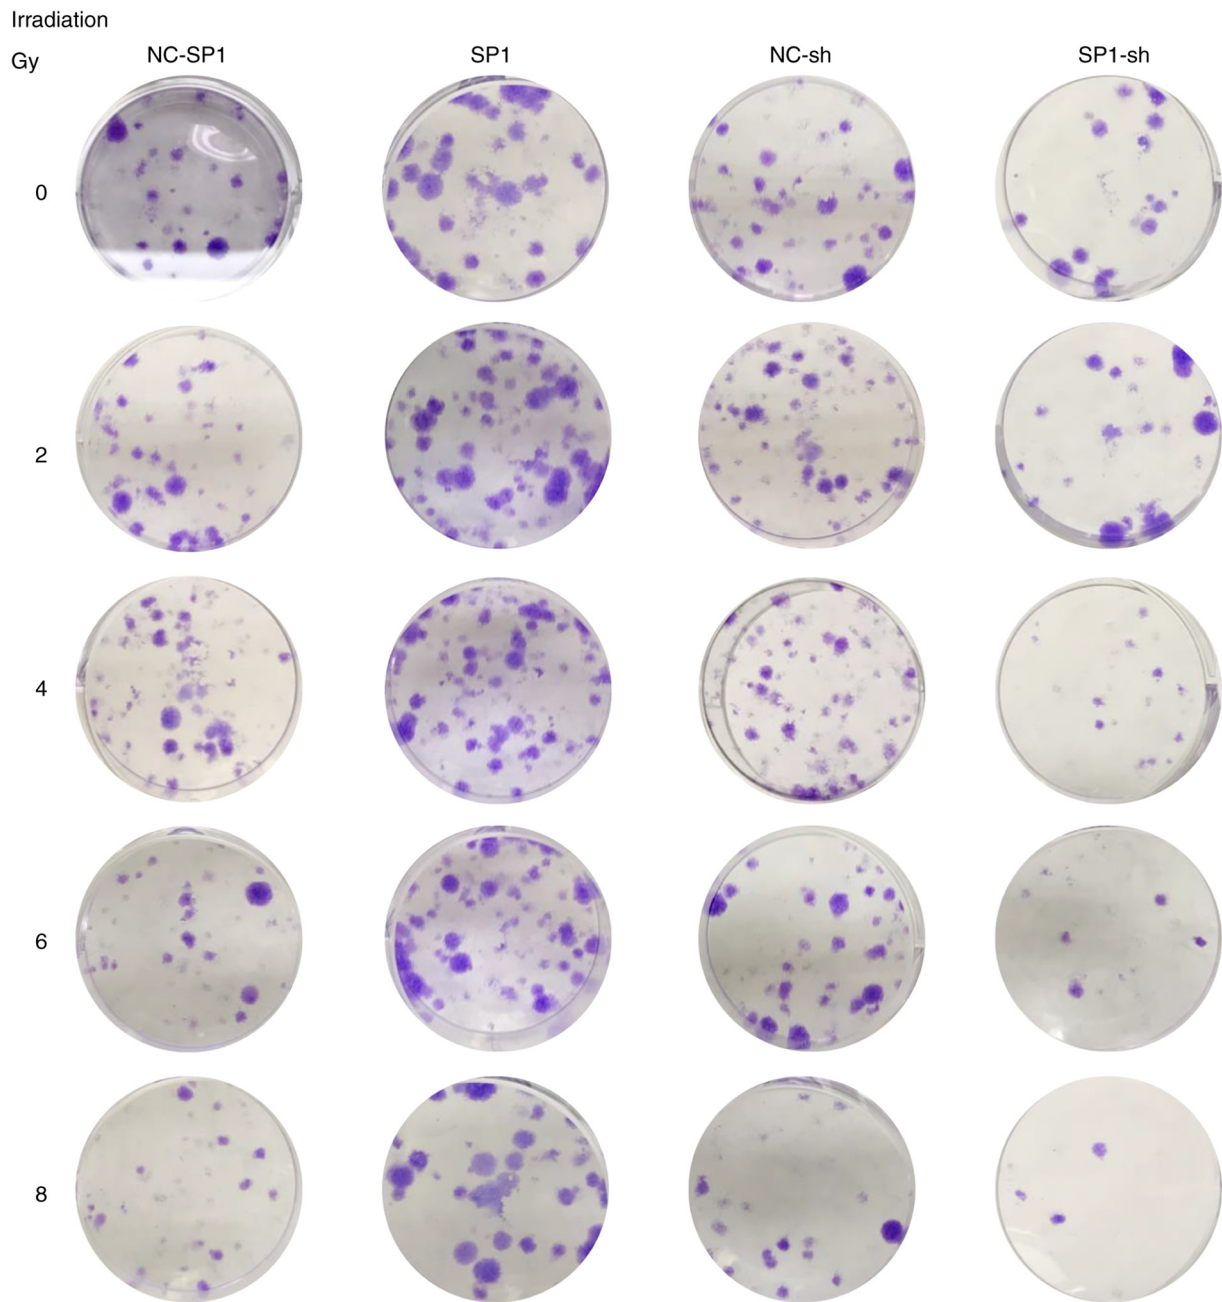

Supplement: Supplementary_Data.pdf [file Supplementary_Data.pdf]
